# Supplementary material for: Synthesis of three-dimensional AgI@TiO2 nanoparticles with improved photocatalytic performance
Source: Royal Society of Chemistry journal article supplement (doi:10.1039/c3dt50736j), 2013-01-01
Supplement: c3dt50736j.pdf [file c3dt50736j.pdf]

## Electronic Supplementary Information (ESI)

### **Synthesis of three-dimensional AgI@TiO<sub>2</sub> nanoparticles with improved photocatalytic performance**

Changhua An,<sup>\*,a,b</sup> Wen Jiang,<sup>b</sup> Jizhuang Wang,<sup>b</sup> Shutao Wang,<sup>a</sup> Zhanhua Ma<sup>b</sup> and Yanpeng Li<sup>b</sup>

<sup>a</sup> *State Key Laboratory of Heavy Oil Processing and College of Science, China University of Petroleum, Qingdao, 266580, China. Fax: (+86) 532-86981787; E-mail: anchh@upc.edu.cn*

<sup>b</sup> *State Key Laboratory of Heavy Oil Processing, College of Chemical Engineering, China University of Petroleum, Qingdao 266580, China*

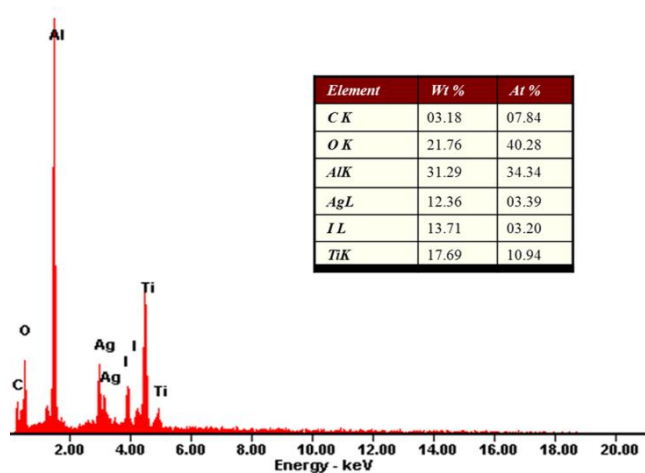

**Figure S1.** EDAX spectrum of AgI@TiO<sub>2</sub>, indicating that sample contains Ag, I, Ti, and O. Ag, I, Ti and O peaks are from the obtained AgI@TiO<sub>2</sub> nanoparticles. The Al peak is from the substrate holder, and C peak may be caused by the adsorbed carbon oxides on the sample in the air.

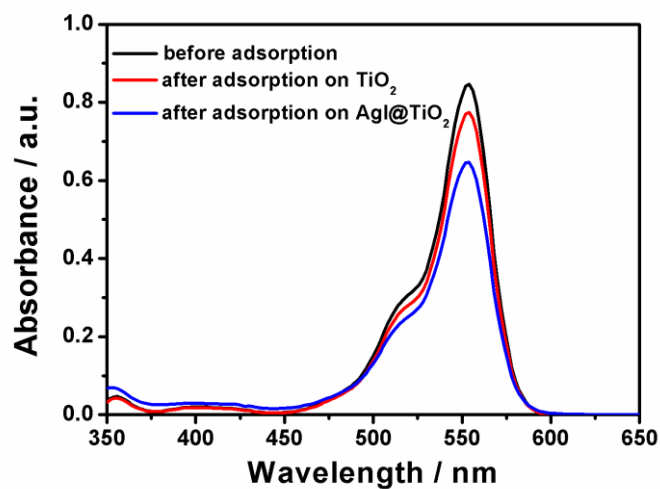

**Figure S2.** The absorption spectra of RhB solution before and after adsorption on the surfaces of AgI@TiO<sub>2</sub> nanocomposites.
